# Supplementary material for: 5′-Triphosphate-RNA-independent activation of RIG-I via RNA aptamer with enhanced antiviral activity
Source: PubMed Central journal article supplement — Nucleic Acids Res. 2011 Nov 29;40(6):2724–33. doi: 10.1093/nar/gkr1098 (PMC3315321; doi:10.1093/nar/gkr1098), 2011-11-29
Supplement: supp_gkr1098_nar-01669-f-2011-File009.pdf [file supp_gkr1098_nar-01669-f-2011-File009.pdf]

## SUPPLEMENTARY INFORMATION

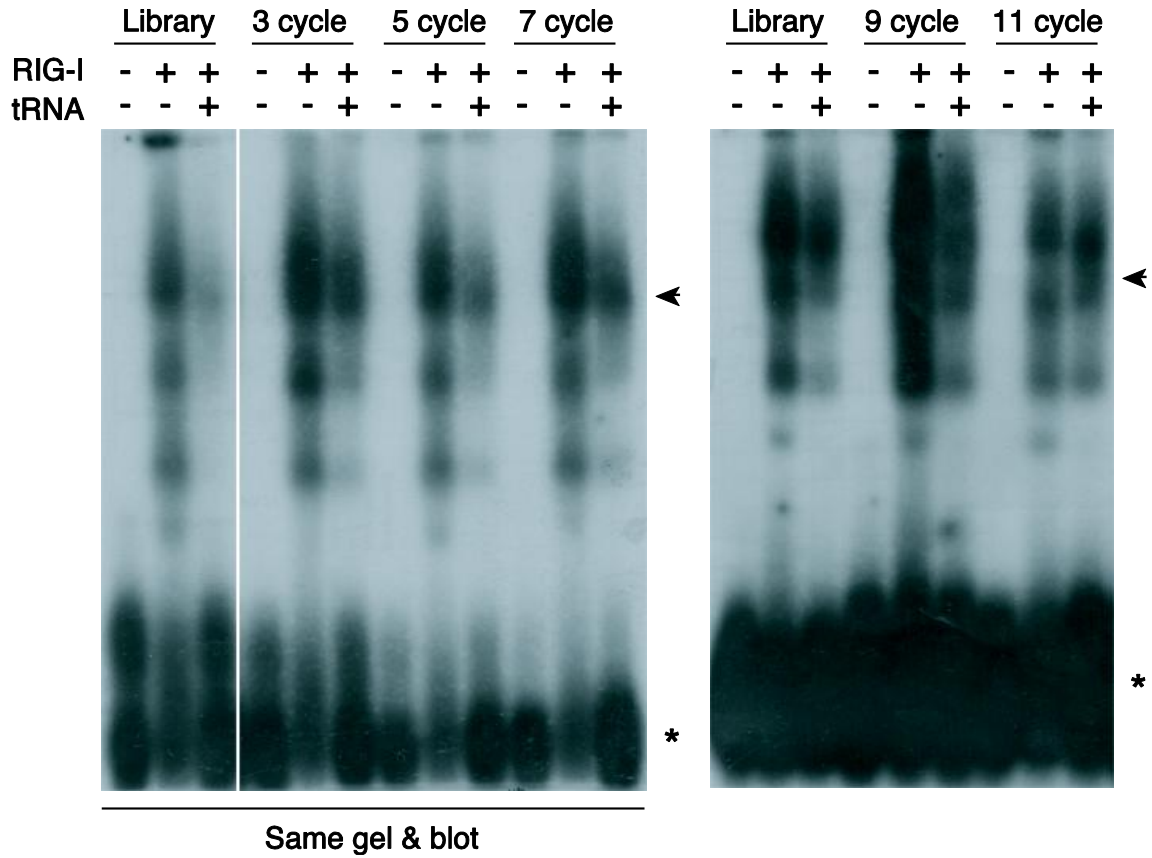

**Supplementary Figure S1.** RNA-EMSA using  $^{32}\text{P}$ -labeled RNA aptamers and purified human RIG-I protein. The number of cycle indicates round of SELEX. Arrowhead indicates aptamer-RIG-I complex. Asterisk, free aptamer.

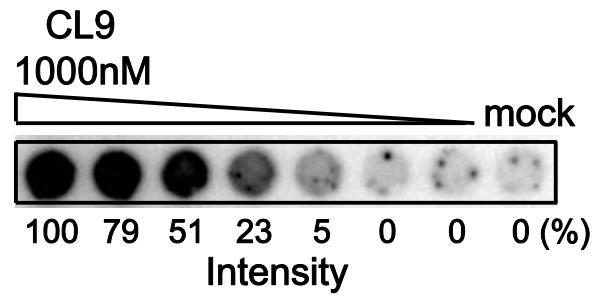

**Supplementary Figure S2.** The binding affinity ( $K_d$ ) of AP-treated CL9 aptamer to full-length RIG-I measured by filter assay.

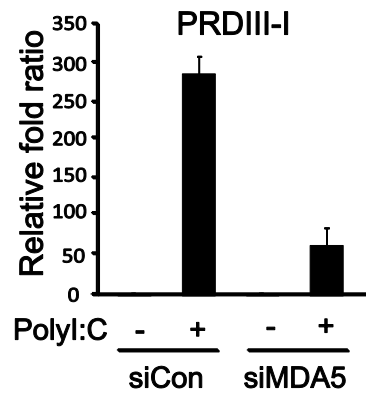

**Supplementary Figure S3.** HepG2 cells were transfected with siCon or siMDA5 for 36 hours, and then stimulated with PolyI:C for 6 hours.

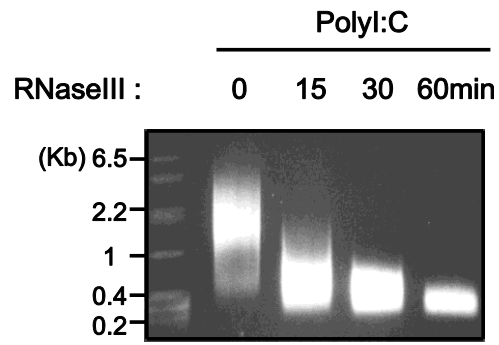

**Supplementary Figure S4.** To control the length of polyI:C, polyI:C was digested with RNaseIII for 1, 15, 30, and 60 minutes at 37°C and separated on a 0.8% agarose gel with EtBr staining.

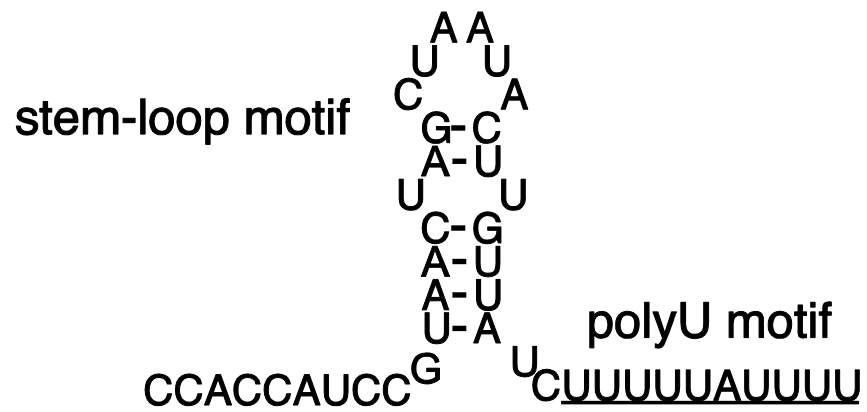

**Supplementary Figure S5. Predicted secondary structure of CL9.** CL9 specific sequence were used for prediction of CL9 by M-fold (1).

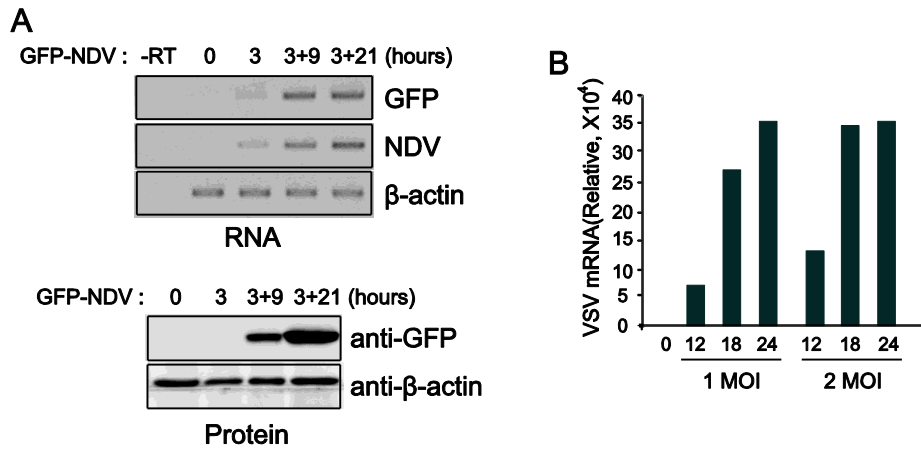

**Supplementary Figure S6. Kinetics of NDV-GFP and VSV-GFP replication.** (A) HepG2 cells were infected with NDV-GFP virus for 3 hours, medium was changed, and cells were cultured for an additional 9 or 21 hours before RNA and protein analyses. (B) Similar to (A), except HepG2 cells were infected with VSV-GFP for indicated times.

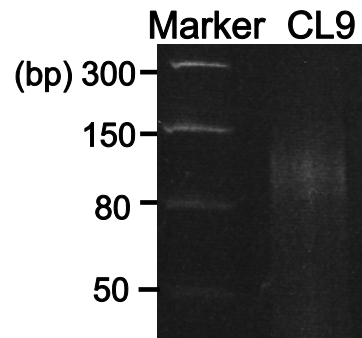

**Supplementary Figure S7.** *In vitro* transcribed CL9 by T7 Polymerase was separated on a 12% Urea-PAGE with EtBr staining, and size of it was compared with ssRNA marker.

## **EXPERIMENTAL PROCEDURES**

### **Binding affinity assays**

We determined RNA–protein equilibrium dissociation constants ( $K_d$ 's) by the nitrocellulose-filter binding method as described (2). For all binding assays, RNAs were dephosphorylated using alkaline phosphatase (New England Biolab), and 5'-end labeled using T4 polynucleotide kinase (New England Biolabs, Beverly, MA) and  $\gamma^{32}\text{P}$ ATP (Amersham Pharmacia Biotech, Piscataway, NJ) as described (3). Before binding assay, heat aptamer at 95°C 3min, and then slowly ramp to 37°C at 0.1°C /sec in buffer (40 mM HEPES/pH 7.5, 120 mM NaCl, 5 mM KCl, 5 mM  $\text{MgCl}_2$ , 0.002% tween-20) for aptamer refolding. Direct binding assays were carried out by incubating  $^{32}\text{P}$ -labeled RNA at a concentration of less than 10 pM and protein at concentrations ranging from 1 mM to 10 fM in selection buffer at 37°C. The fraction of RNA bound was quantified with a PhosphorImager (Fuji FLA-5100 Image Analyzer, Tokyo, Japan). Raw binding data were corrected for nonspecific background binding of radiolabeled RNA to the nitrocellulose filter as described (2) and reported as the mean  $\pm$  standard error of the mean (SEM) of three experiments.

In Figure 1C & Supplementary Figure S1, binding mixture of  $^{32}\text{P}$ -labeled aptamer ( $1 \times 10^5$  CPMA), 3  $\mu\text{g}$  of yeast tRNA, and 100 nM of RIG-I protein was separated in 4% PAGE containing 1.33% Glycerol. To detection radioactivity of aptamer, it was exposed on X-ray film (Fujifilm).

### **Size control of PolyI:C**

To obtain the short form of polyI:C, 1 U of RNaseIII (Takara) was incubated with 10  $\mu\text{g}$  of polyI:C at 37°C for 1 hour, and fragmented polyI:C was precipitated using phenol/ethanol precipitation (4).



## REFERENCES

1. Zuker, M. (2003) Mfold web server for nucleic acid folding and hybridization prediction. *Nucleic Acids Res*, **31**, 3406-3415.
2. White, R., Rusconi, C., Scardino, E., Wolberg, A., Lawson, J., Hoffman, M. and Sullenger, B. (2001) Generation of species cross-reactive aptamers using "toggle" SELEX. *Mol Ther*, **4**, 567-573.
3. Fitzwater, T. and Polisky, B. (1996) A SELEX primer. *Methods Enzymol*, **267**, 275-301.
4. Kato, H., Takeuchi, O., Mikamo-Satoh, E., Hirai, R., Kawai, T., Matsushita, K., Hiiragi, A., Dermody, T.S., Fujita, T. and Akira, S. (2008) Length-dependent recognition of double-stranded ribonucleic acids by retinoic acid-inducible gene-I and melanoma differentiation-associated gene 5. *J Exp Med*, **205**, 1601-1610.
